# Supplementary material for: Jianpi Huayu Decoction Attenuates the Immunosuppressive Status of H22 Hepatocellular Carcinoma-Bearing Mice: By Targeting Myeloid-Derived Suppressor Cells
Source: PubMed Central journal article supplement (PMC7042893; doi:10.3389/fphar.2020.00016), 2020-02-18
Supplement: DataSheet_1.pdf [file DataSheet_1.pdf]

## Supplementary Material 1

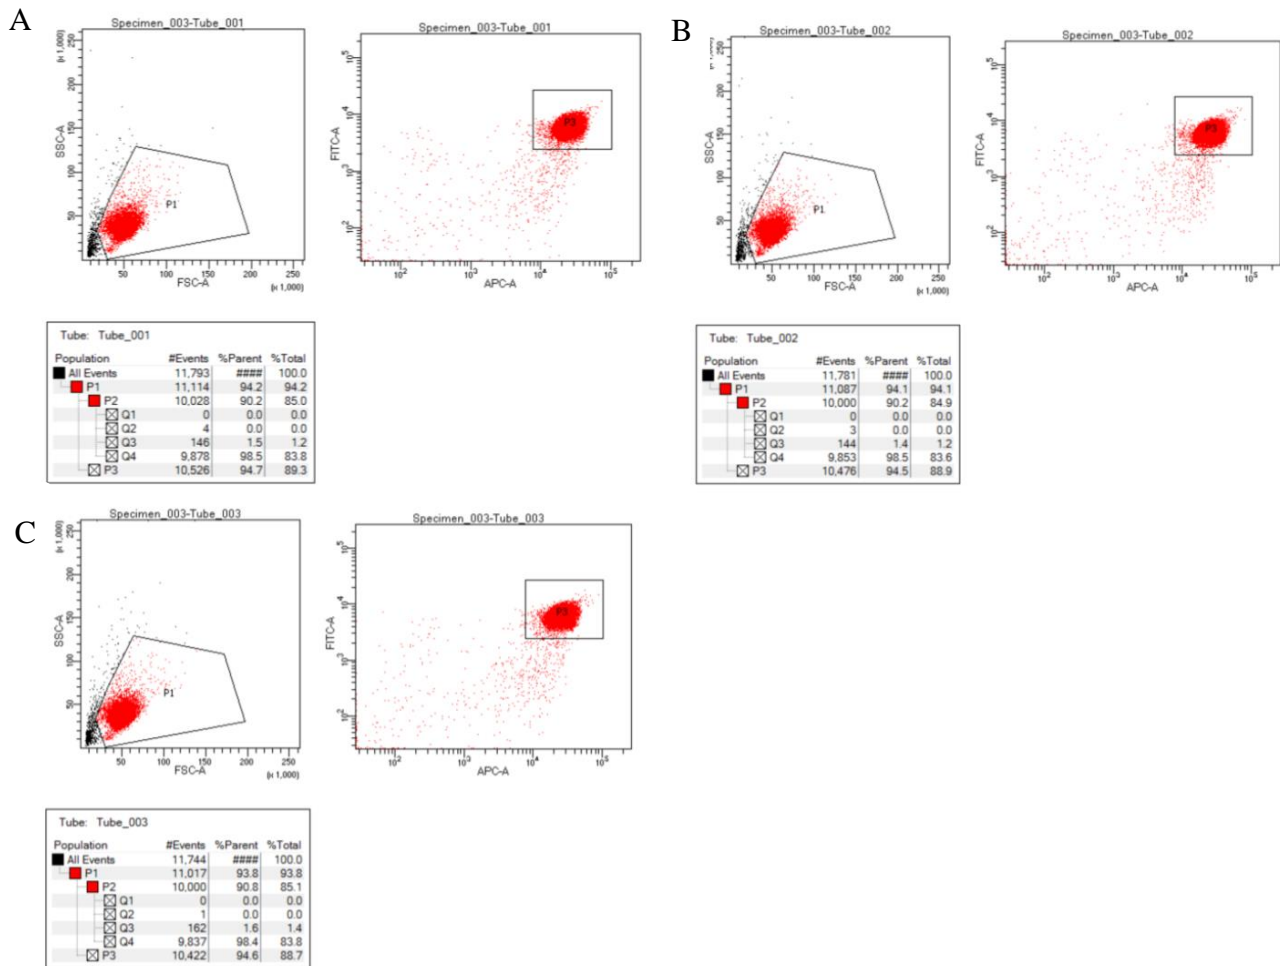

**Supplementary Figure 1.** The purity of myeloid-derived suppressor cells which isolated from bone marrow and spleen of H22 hepatoma carcinoma-bearing mice. The purity of MDSCs was confirmed by flow cytometry (n=3) and was up to 94%.
