# Supplementary material for: Jianpi Huayu Decoction Attenuates the Immunosuppressive Status of H22 Hepatocellular Carcinoma-Bearing Mice: By Targeting Myeloid-Derived Suppressor Cells
Source: PubMed Central journal article supplement (PMC7042893; doi:10.3389/fphar.2020.00016), 2020-02-18
Supplement: DataSheet_2.pdf [file DataSheet_2.pdf]

## Supplementary Material 2

Specimen: **Radix Sophorae Flavescentis (Sophora flavescens Alt, Leguminosae)**

Batch number: 181003011

Inspection item:

1. Morphological identification: meet the specification.
2. Microscopic identification:

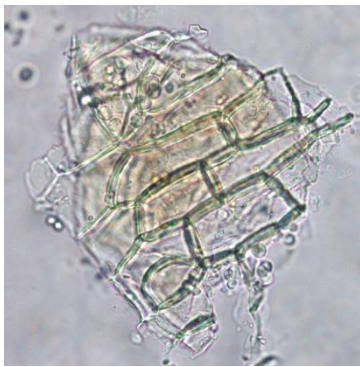

cork cell

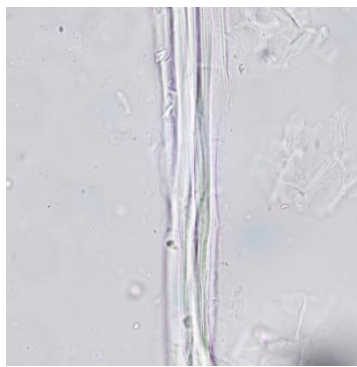

fiber

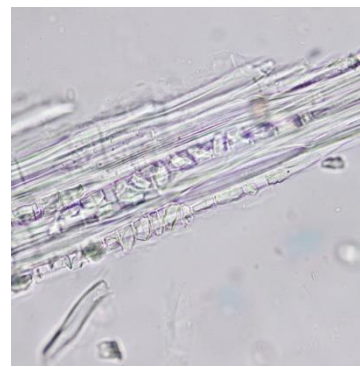

crystal fiber

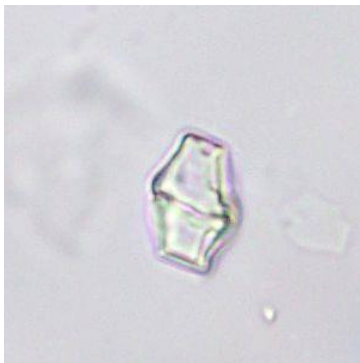

Calcium oxalate square crystal  
granules

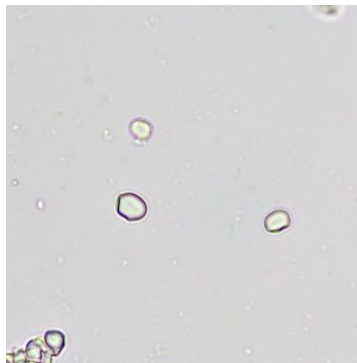

starch grain

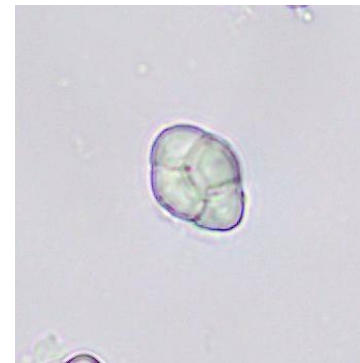

Starch granules are compound

3. Thin-layer chromatography:

(1) method1:

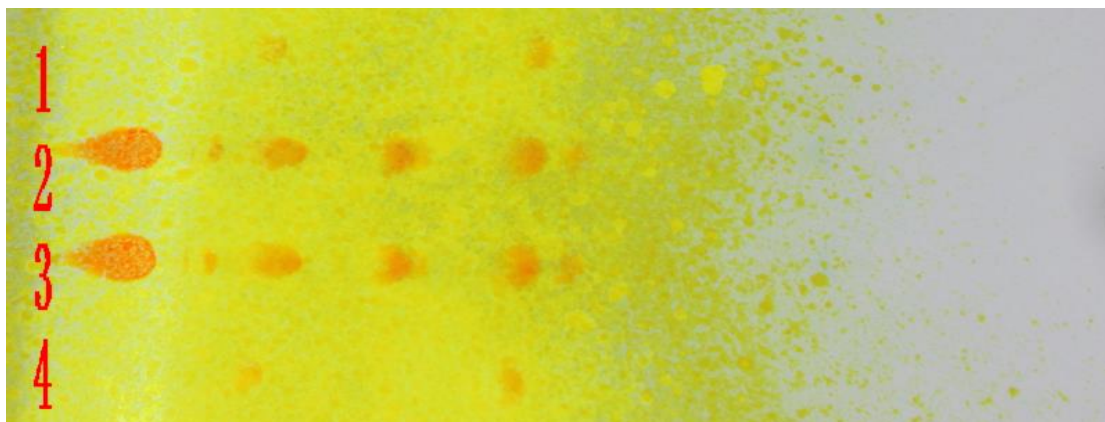

|                                |                                                                                                    |                         |
|--------------------------------|----------------------------------------------------------------------------------------------------|-------------------------|
| Thin layer diagram information | 1,4---- Mixed solution of matrine and sophoridine                                                  | Point sample: 4 $\mu$ l |
|                                | 2,3---- sample                                                                                     | Point sample: 4 $\mu$ l |
| Thin laminate information      | Silica gel G thin laminate prepared by 2% sodium hydroxide solution                                |                         |
| Developing solvent             | Toluene - acetone - methanol (8: 3: 0.5) + Toluene - ethyl acetate - methanol - water (2: 4: 2: 1) |                         |
| Chromogenic agent              | Bismuth iodide potassium test solution and sodium nitrite ethanol test solution                    |                         |
| Viewing                        | white light                                                                                        |                         |

(2) method 2:

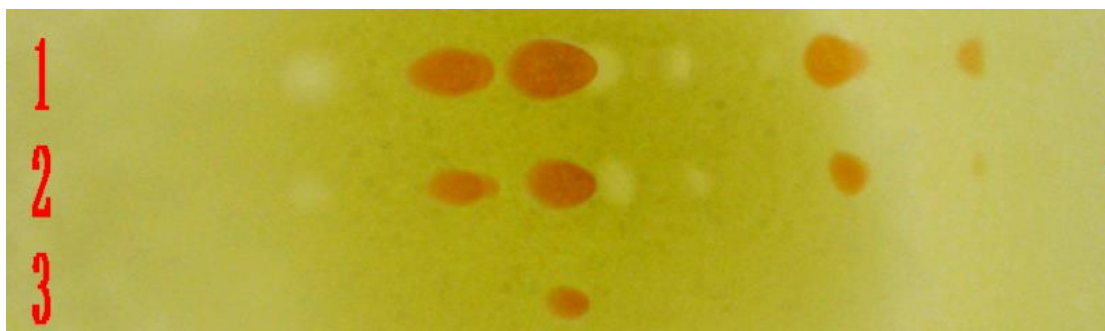

|                                |                                                                                 |                         |
|--------------------------------|---------------------------------------------------------------------------------|-------------------------|
| Thin layer diagram information | 1 ,2---- sample                                                                 | Point sample: 4 $\mu$ l |
|                                | 3---- oxymatrine                                                                | Point sample: 4 $\mu$ l |
| Thin laminate information      | Silica gel G thin laminate prepared by 2% sodium hydroxide solution             |                         |
| Developing solvent             | Trichloromethane - methanol - concentrated ammonia solution<br>(5: 0.6: 0.3)    |                         |
| Chromogenic agent              | Bismuth iodide potassium test solution and sodium nitrite ethanol test solution |                         |
| Viewing                        | white light                                                                     |                         |

#### 4. chemical identification:

- ①inspection item: Water content  
inspection provisions: < 10.5%  
result: 8.58%
- ②inspection item: total ash  
inspection provisions: < 8.0%  
result: 4.8%

③inspection item: Residual sulfur dioxide

inspection provisions: < 130mg/kg

result: 0mg/kg

• ④inspection item: Extract

inspection provisions: > 20.0%

result: 32.1%

• ⑤inspection item: content determination

inspection provisions: The total content of matrine (C<sub>15</sub>H<sub>24</sub>N<sub>2</sub>O) and oxymatrine (C<sub>15</sub>H<sub>24</sub>N<sub>2</sub>O<sub>2</sub>) shall not be less than 1.3% as calculated by dry product

result: 2.2%

**Conclusion:** Conformed to the quality standards of Chinese pharmacopoeia.

**Quality supervisor:** An Luo

**Specimen:** *Poria* (*Poria cocos* (Schw.) Wolf, Polyporaceae)

**Batch number:** 18110671

**Inspection item:**

1. Morphological identification: meet the specification.
2. Microscopic identification:

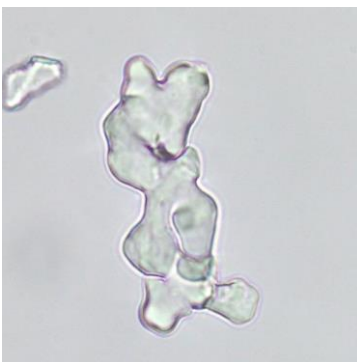

Irregular granular mass

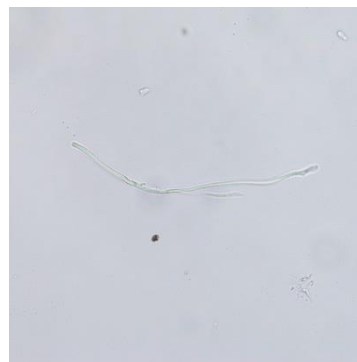

hypha

### 3. Thin-layer chromatography:

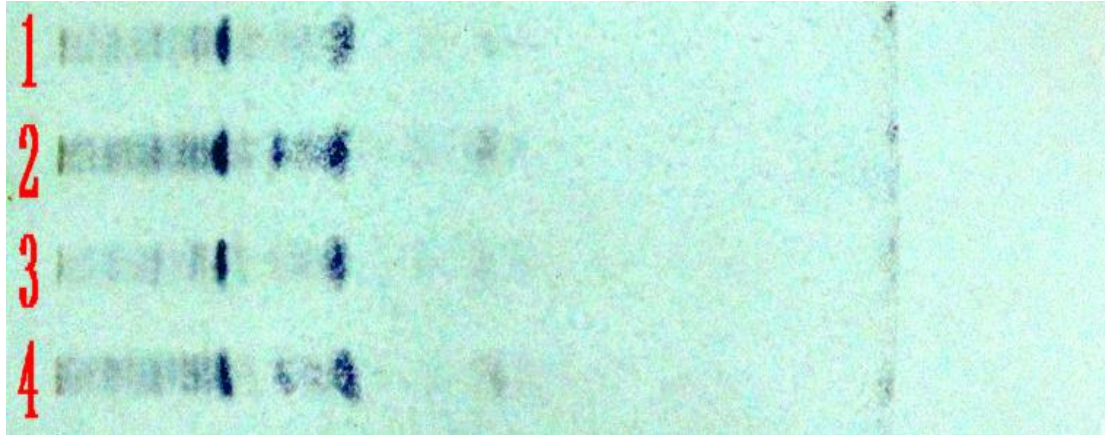

|                                |                                                    |                         |
|--------------------------------|----------------------------------------------------|-------------------------|
| Thin layer diagram information | 1,3---- Poria control herb                         | Point sample: 2 $\mu$ l |
|                                | 2,4---- sample                                     | Point sample: 2 $\mu$ l |
| Thin laminate information      | Silicon G thin laminate                            |                         |
| Developing solvent             | Toluene - ethyl acetate - formic acid (20:5:0.5)   |                         |
| Chromogenic agent              | 2% Vanillin sulfuric acid solution - ethanol (4:1) |                         |
| Viewing                        | white light                                        |                         |

### 4. chemical identification:

- ①inspection item: Water content  
 inspection provisions: < 17.5%  
 result: 16.1%

②inspection item: The total ash content

inspection provisions: < 2.0%

result: 0.41%

③inspection item: Residual sulfur dioxide

inspection provisions: < 130mg/kg

result: 0mg/kg

• ④inspection item: extractum

inspection provisions: > 3.0%

result: 4.8%

**Conclusion:** Conformed to the quality standards of Chinese pharmacopoeia.

**Quality supervisor:** An Luo

**Specimen: Fructus Citri Sarcodactylis (Citrus medica Linn. var. sarcodactylis (Noot.) Swingle, Rutaceae)**

Batch number: 180902031

Inspection item:

1. Morphological identification: meet the specification.
2. Microscopic identification:

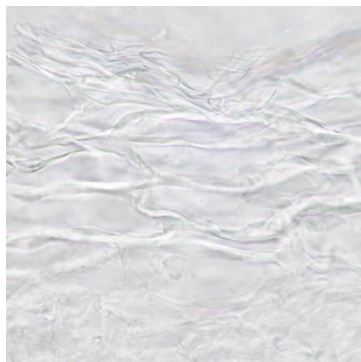

Pericarp parenchyma

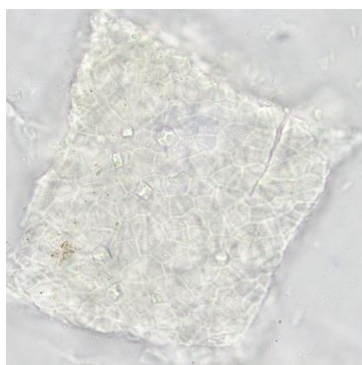

Surface appearance of epidermal cells in pericarp

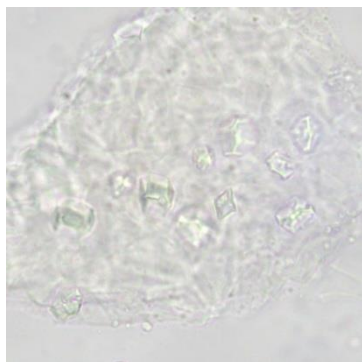

Calcium oxalate square crystal

3. thin-layer chromatography:

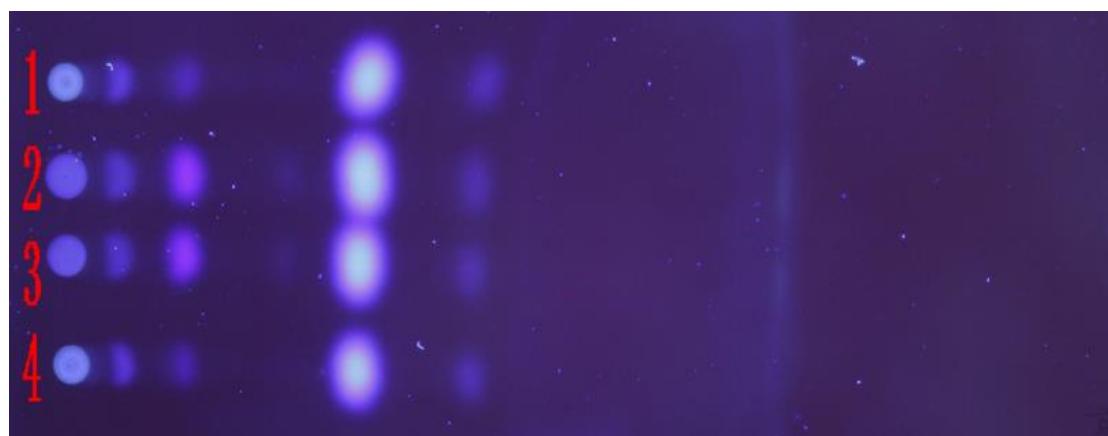

|                                |                                                      |                         |
|--------------------------------|------------------------------------------------------|-------------------------|
| Thin layer diagram information | 1,4---- Fructus Citri<br>Sarcodactylis control herbs | Point sample: 2 $\mu$ l |
|                                | 2,3---- sample                                       | Point sample: 2 $\mu$ l |

|                           |                                  |
|---------------------------|----------------------------------|
| Thin laminate information | Silicon G thin laminate          |
| Developing solvent        | Ethyl cyclohexane-acetate (3: 1) |
| Chromogenic agent         | /                                |
| Viewing                   | UV365nm                          |

### 3. chemical identification:

- ①inspection item: Water content  
inspection provisions: < 14.5%  
result: 13.3%
- ②inspection item: Residual sulfur dioxide  
inspection provisions: < 130mg/kg  
result: 0mg/kg
- ③inspection item: extractum  
inspection provisions: > 10.0%  
result: 33.3%
- ④inspection item: content determination  
inspection provisions: For dried products, the content of hesperidin (C<sub>28</sub>H<sub>34</sub>O<sub>15</sub>) shall not be less than 0.030%.  
result: 0.037%

**Conclusion:** Conformed to the quality standards of Chinese pharmacopoeia.



**Quality supervisor:** An Luo

**Specimen:** **Rhizoma Curcumae** (**Curcuma zedoaria** (Christm.) Rose,  
**Zingiberaceae**)

**Batch number:** 181202941

**Inspection item:**

1. Morphological identification: meet the specification.
2. Microscopic identification:
  - (1) Rhizome transection:

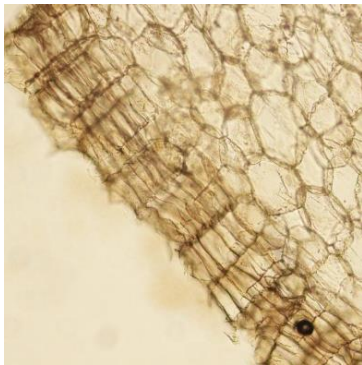

suberized cell

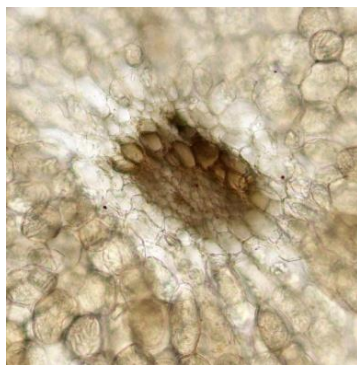

Cortical trace vascular bundles

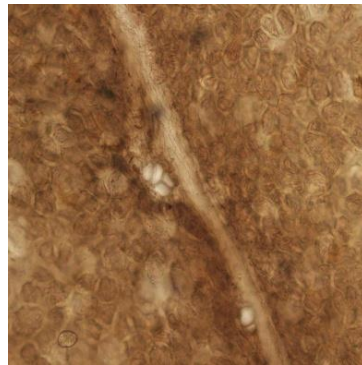

endothelial cells

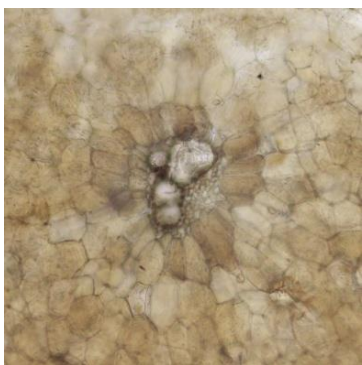

Central column external tough vascular bundl

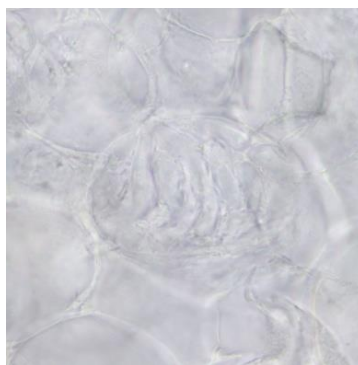

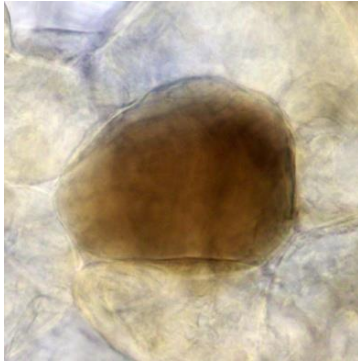

cell containing a golden, oily substance

(2) powder:

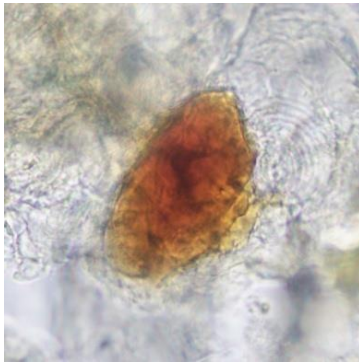

aleocyst

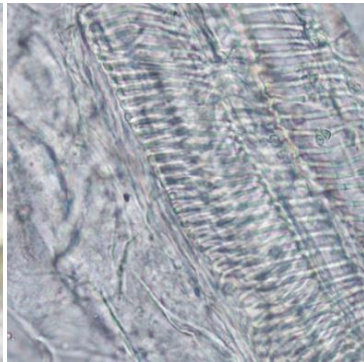

spiral duct

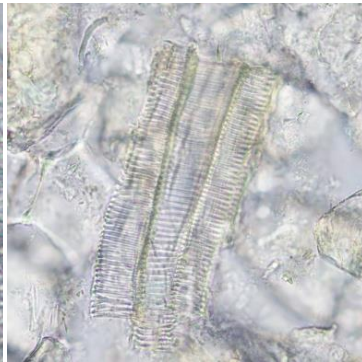

scalariform vessel

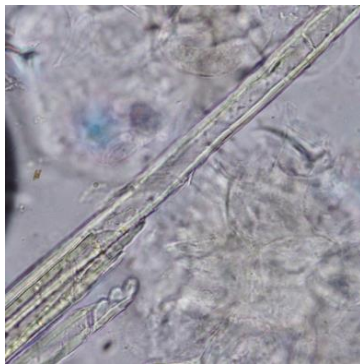

fiber

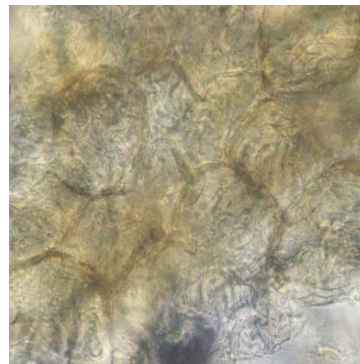

Starch grains are mostly gelatinized

3. Thin-layer chromatography:

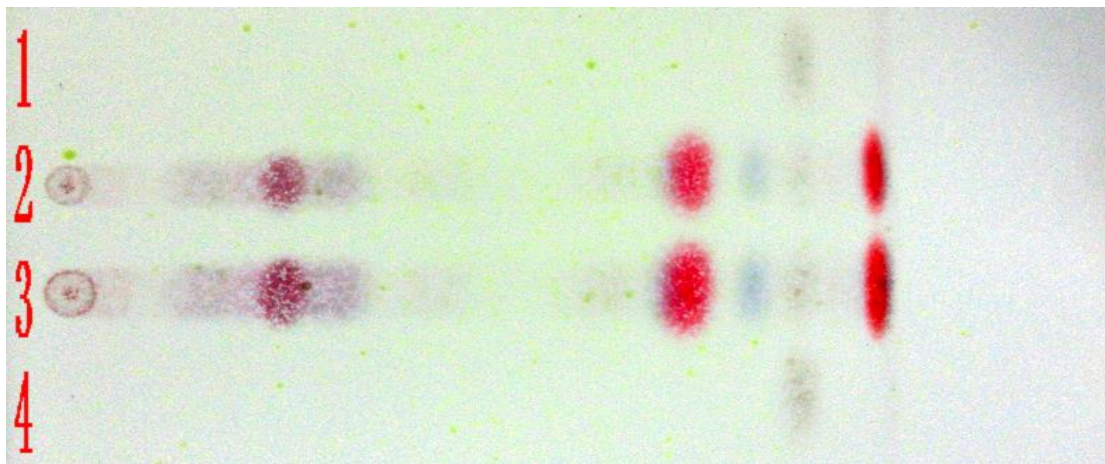

|                                |                                                             |                     |
|--------------------------------|-------------------------------------------------------------|---------------------|
| Thin layer diagram information | 1,4----Germacrone                                           | Point sample: 10 μl |
|                                | 2,3---- sample                                              | Point sample: 10 μl |
| Thin laminate information      | Silicon G thin laminate                                     |                     |
| Developing solvent             | Petroleum ether (30~60℃) - Acetone - ethyl acetate (94:5:1) |                     |
| Chromogenic agent              | 1% Vanillin sulfuric acid solution                          |                     |
| Viewing                        | white light                                                 |                     |

- 
- 4. Chemical identification:
  - ①inspection item: absorbance
    - inspection provisions: > 0.45
    - result: 1.1
  - ②inspection item: Water content

inspection provisions: < 13.5%

result: 10.2%

- ③inspection item: total ash

inspection provisions: < 7.0%

result: 4.0%

- ④inspection item: acid-insoluble ash

inspection provisions: < 2.0%

result: 1.2%

- ⑤inspection item: Residual sulfur dioxide

inspection provisions: < 130mg/kg

result: 0mg/kg

- ⑥inspection item: extractum

inspection provisions: > 7.0%

result: 13%

- ⑦inspection item: content determination

inspection provisions: Contain not less than 1.6% volatile oil (ml/g)

result: 1.7% (ml/g)

**Conclusion:** Conformed to the quality standards of Chinese pharmacopoeia.

**Quality supervisor:** An Luo



Specimen: **Rhizoma Atractylodis Macrocephalae (Atractylodes macrocephala Koidz, Compositae)**

Batch number: 181003941

Inspection item:

1. Morphological identification: meet the specification.
2. Microscopic identification:

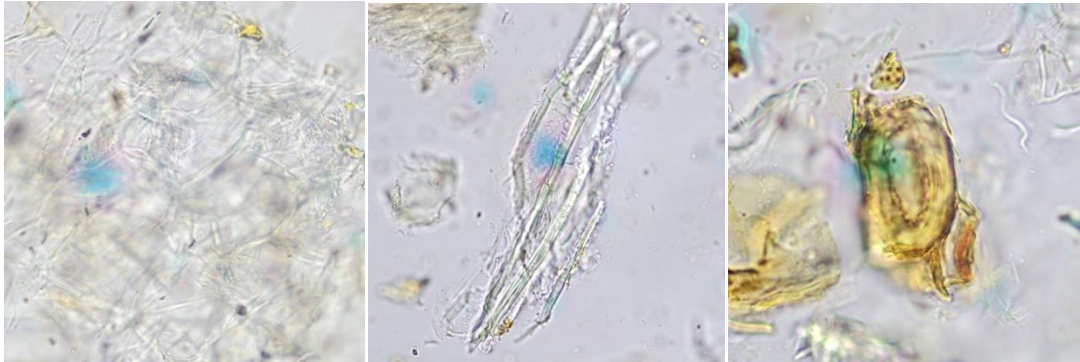

calcium oxalate crystal

fiber

stone cell

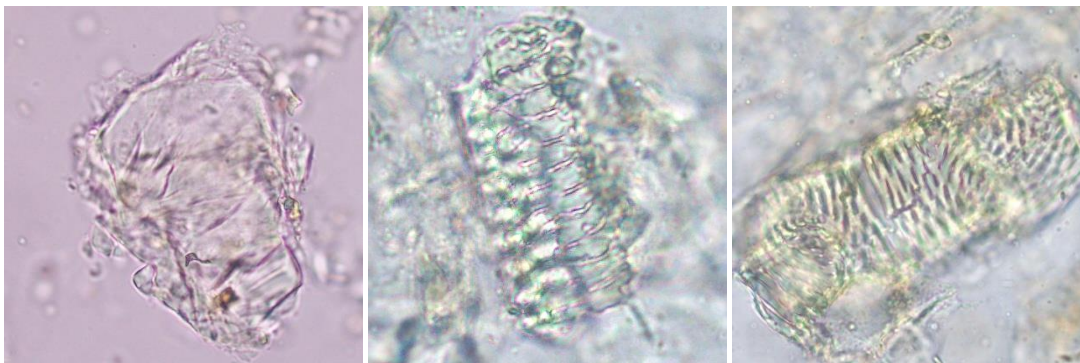

synanthrin

reticulate vessel

bordered pit vessel

3. Thin-layer chromatography:

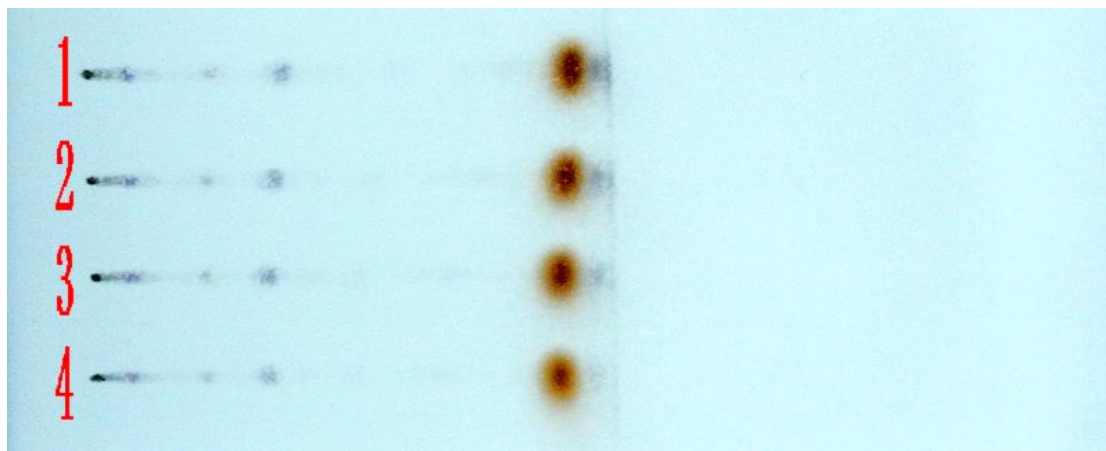

|                                |                                                              |                     |
|--------------------------------|--------------------------------------------------------------|---------------------|
| Thin layer diagram information | 1, 4---- Rhizoma Atractylodis<br>Macrocephalae control herbs | Point sample: 10 μl |
|                                | 2, 3----sample                                               | Point sample: 10 μl |
| Thin laminate information      | Silicon G thin laminate                                      |                     |
| Developing solvent             | petroleum ether (60~90℃) - ethyl acetate (50: 1)             |                     |
| Chromogenic agent              | 5% Vanillin sulfuric acid solution                           |                     |
| Viewing                        | white light                                                  |                     |

#### 4. Chemical identification:

① inspection item: Water content

inspection provisions: < 14.5%

result: 13.6%

②inspection item: The total ash content

inspection provisions: < 5.0%

inspection result: 3.6%

③inspection item: Residual sulfur dioxide

inspection provisions: < 350mg/kg

inspection result: 248 mg/kg

④inspection item: chromaticity

inspection provisions: According to the solution color test method, compared with the yellow no. 9 standard color solution, should not be deeper.

inspection result: meet the specification

| ⑤inspection item: extractum

inspection provisions: > 35.0%

inspection result: 39.8%

**Conclusion:** Conformed to the quality standards of Chinese pharmacopoeia.

**Quality supervisor:** An Luo

Specimen: **Hedyotis diffusa (Hedyotis diffusa Willd. Var. Longipes Nakai, Rubiaceae)**

Batch number: 181103361

Inspection item:

1. Morphological identification: meet the specification.
2. Thin-layer chromatography:

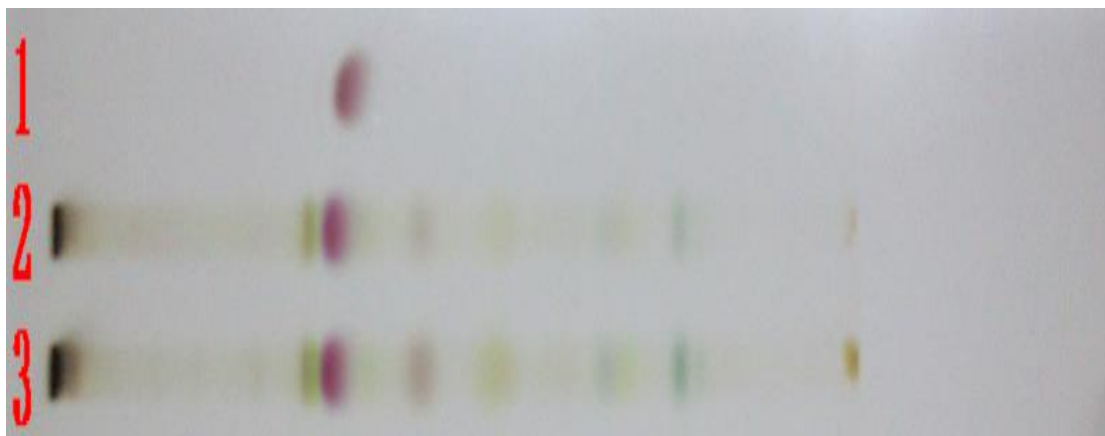

|                                |                                                                                        |                                    |
|--------------------------------|----------------------------------------------------------------------------------------|------------------------------------|
| Thin layer diagram information | 1---- Oleanolic acid reference                                                         | Point sample: <u>  5  </u> $\mu$ l |
|                                | 2---- Hedyotis diffusa reference                                                       | Point sample: <u>  5  </u> $\mu$ l |
|                                | 3---- sample                                                                           | Point sample: <u>  5  </u> $\mu$ l |
| Thin laminate information      | Silicon G thin laminate                                                                |                                    |
| Developing solvent             | petroleum ether (30~60°C) - Toluene - ethyl acetate - glacial acetic acid (20:40:14:1) |                                    |
| Chromogenic agent              | 10% Sulfuric acid ethanol solution                                                     |                                    |
| Viewing                        | white light                                                                            |                                    |

## 3. Chemical identification:

① inspection item: Water content

inspection provisions: &lt;12.5%



Result: 10.1%

②inspection item: Residual sulfur dioxide

inspection provisions: < 130mg/kg

Result: 0mg/kg

③inspection item: Extractum

inspection provisions: > 6.0%

inspection result: 9.8%

④inspection item: Content determination

inspection provisions: For dry products, the total amount of Oleanolic acid (C<sub>30</sub>H<sub>48</sub>O<sub>3</sub>) and Ursolic acid (C<sub>30</sub>H<sub>48</sub>O<sub>3</sub>) shall not be less than 0.15%.

Result: 0.037%

**Conclusion:** Conformed to the quality standards of Chinese pharmacopoeia.

**Quality supervisor:** An Luo
